# Supplementary material for: Macronutrient metabolism by the human gut microbiome: major fermentation by-products and their impact on host health
Source: PubMed Central journal article supplement (PMC6567490; doi:10.1186/s40168-019-0704-8), 2019-06-13

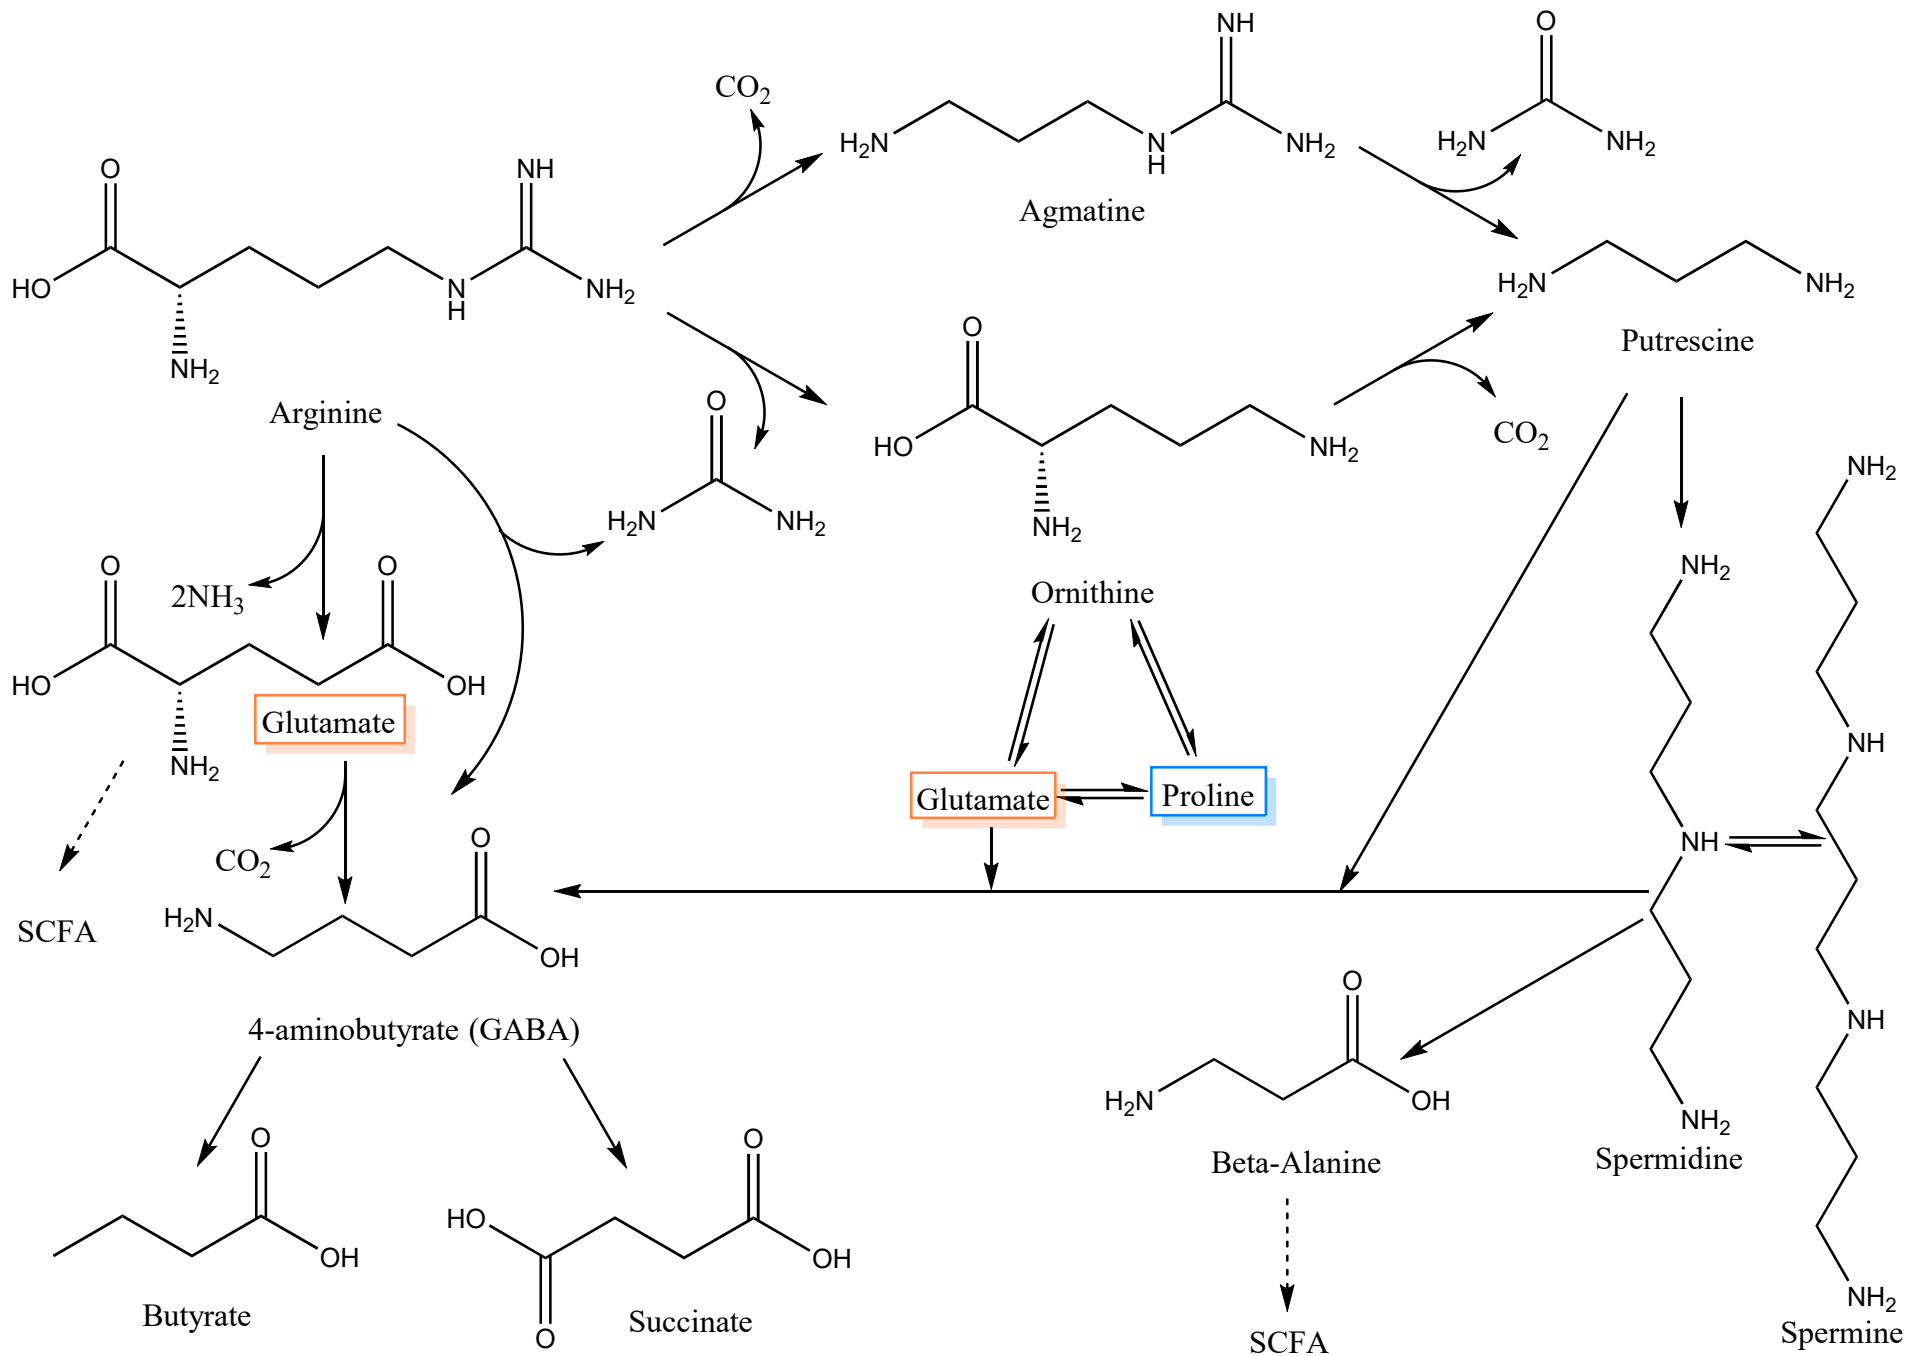

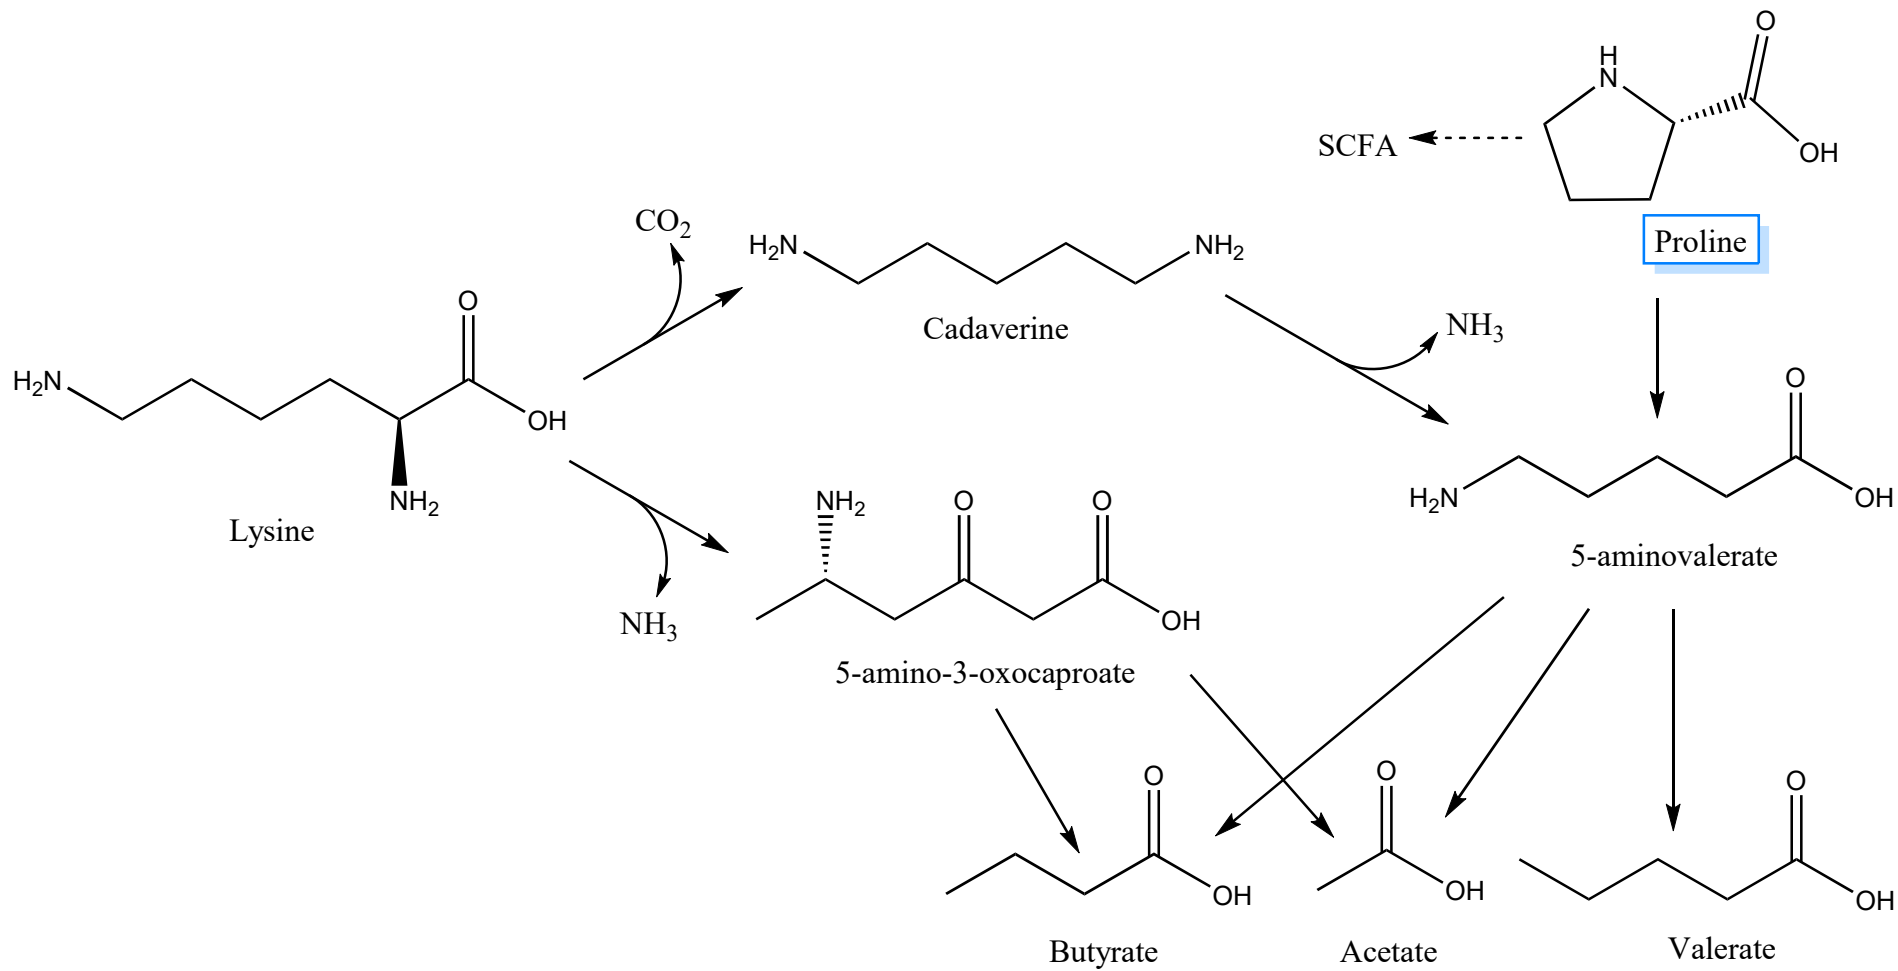

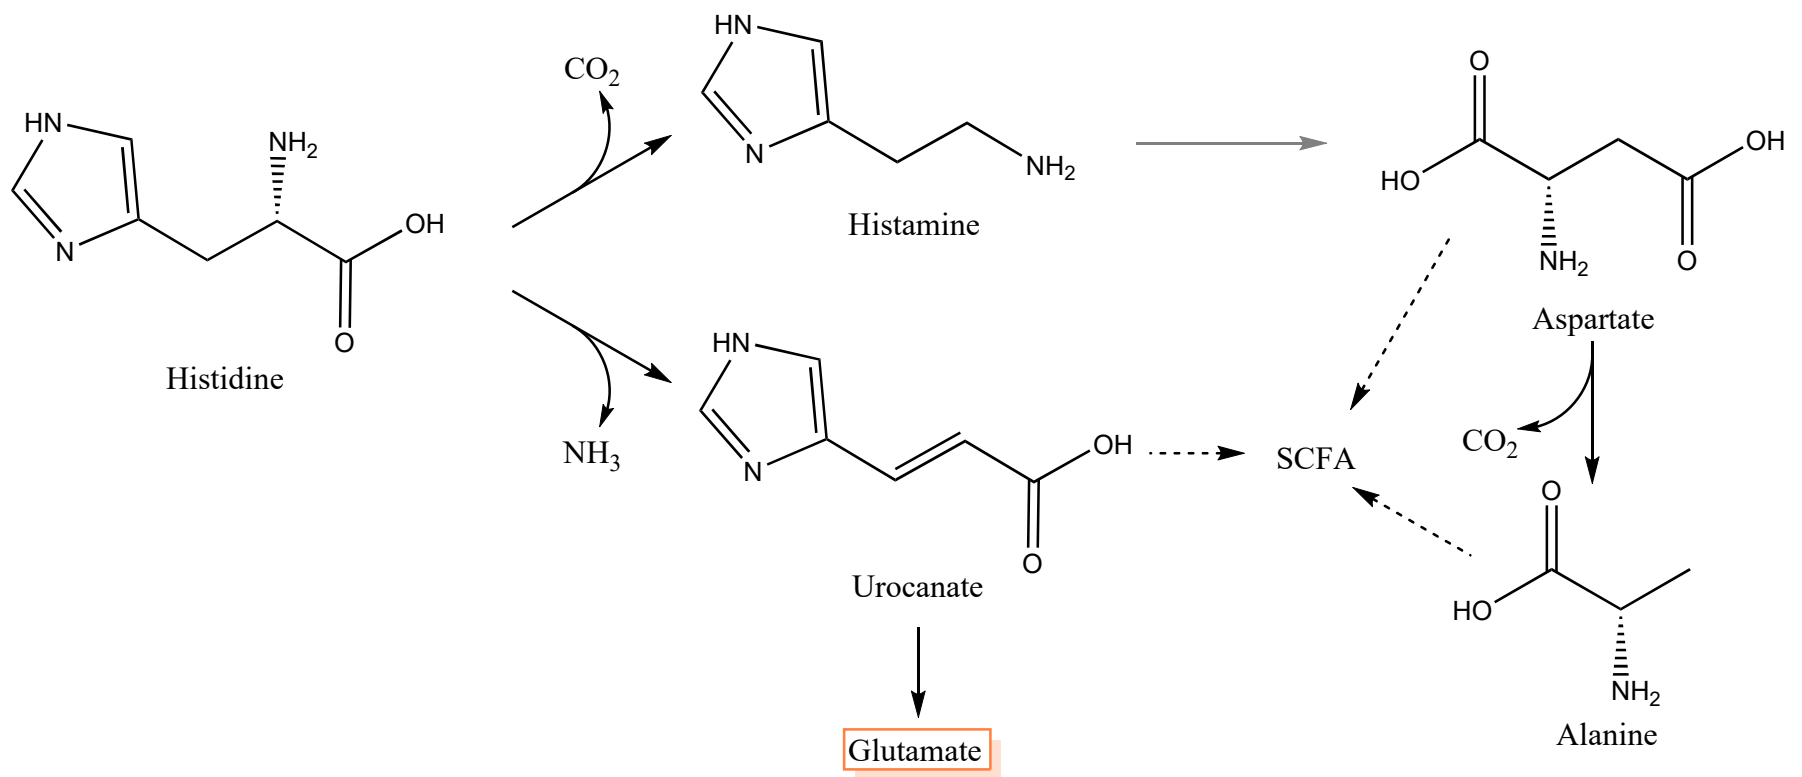

Supplement: 40168_2019_704_MOESM1_ESM.pdf [file 40168_2019_704_MOESM1_ESM.pdf]
